# Supplementary material for: Patient-reported systemic symptoms in women with silicone breast implants: a descriptive cohort study
Source: HighWire-hosted journal article supplement (doi:10.1136/bmjopen-2021-057159), 2022-06-01
Supplement: bmjopen-2021-057159supp001_data_supplement.pdf [file bmjopen-2021-057159supp001_data_supplement.pdf]

**Supplemental table 1. Autoimmune diseases**

| Diagnosis                             | n*  |
|---------------------------------------|-----|
| Rheumatoid arthritis (RA)             | 17  |
| Inflammatory bowel disease (IBD)      | 11  |
| Lichen sclerosis                      | 9   |
| Sjögren's disease                     | 6   |
| Scleroderma / systemic sclerosis (SS) | 6   |
| Systemic lupus erythematosus (SLE)    | 4   |
| Psoriasis                             | 4   |
| Coeliac disease                       | 4   |
| Vasculitis                            | 3   |
| Multiple sclerosis (MS)               | 3   |
| Thyroid disease                       | 35† |

n= number of women with diagnosis; \* some women reported more than one autoimmune disease; † 35 women reported thyroid disease; however, it was often unknown whether this was autoimmune mediated and therefore not included in the total number of patients with autoimmune diseases

**Supplemental table 2. Laboratory test for antinuclear antibodies (ANA)**

|                                                        | N   | %  |
|--------------------------------------------------------|-----|----|
| ANA in all women (n=358)                               |     |    |
| Negative                                               | 233 | 65 |
| Doubtful                                               | 43  | 12 |
| Positive                                               | 84  | 23 |
| ANA in women with diagnosed autoimmune disease (n=42)* |     |    |
| Negative                                               | 14  | 33 |
| Doubtful                                               | 8   | 19 |
| Positive                                               | 20  | 48 |
| ANA in women without autoimmune disease (n=319)        |     |    |
| Negative                                               | 219 | 69 |
| Doubtful                                               | 36  | 11 |
| Positive                                               | 64  | 20 |

ANA testing was performed by indirect immunofluorescence (IFF) with HEp-2000 cell line, with a 1:40 dilution.

\* autoimmune disease as reported in Supplementary, Table 1.
